# Supplementary material for: Eco-friendly one-pot synthesis of well-adorned mesoporous g-C3N4 with efficiently enhanced visible light photocatalytic activity
Source: Royal Society of Chemistry journal article supplement (doi:10.1039/c7cy00286f), 2017-01-01
Supplement: c7cy00286f1.pdf [file c7cy00286f1.pdf]

## Supplementary Information

### Eco-friendly one-pot synthesis of well-adorned mesoporous g-C<sub>3</sub>N<sub>4</sub> with efficiently enhanced visible light photocatalytic activity

Waheed Iqbal<sup>a</sup>, Chunyang Dong<sup>a</sup>, Mingyang Xing<sup>a</sup>, Xianjun Tan<sup>a</sup>, Jinlong Zhang<sup>\*a,b</sup>

a Key Laboratory for Advanced Materials and Institute of Fine Chemicals, School of Chemistry and Chemical Engineering, East China University of Science and Technology, 130-Meilong Road, Shanghai 200237, P. R. China

b 558 Fenhu Road, Suzhou 201211, P. R. China

E-mail: jlzhang@ecust.edu.cn, Tel.: +86-21-64252062, Fax: +86-21-64252062

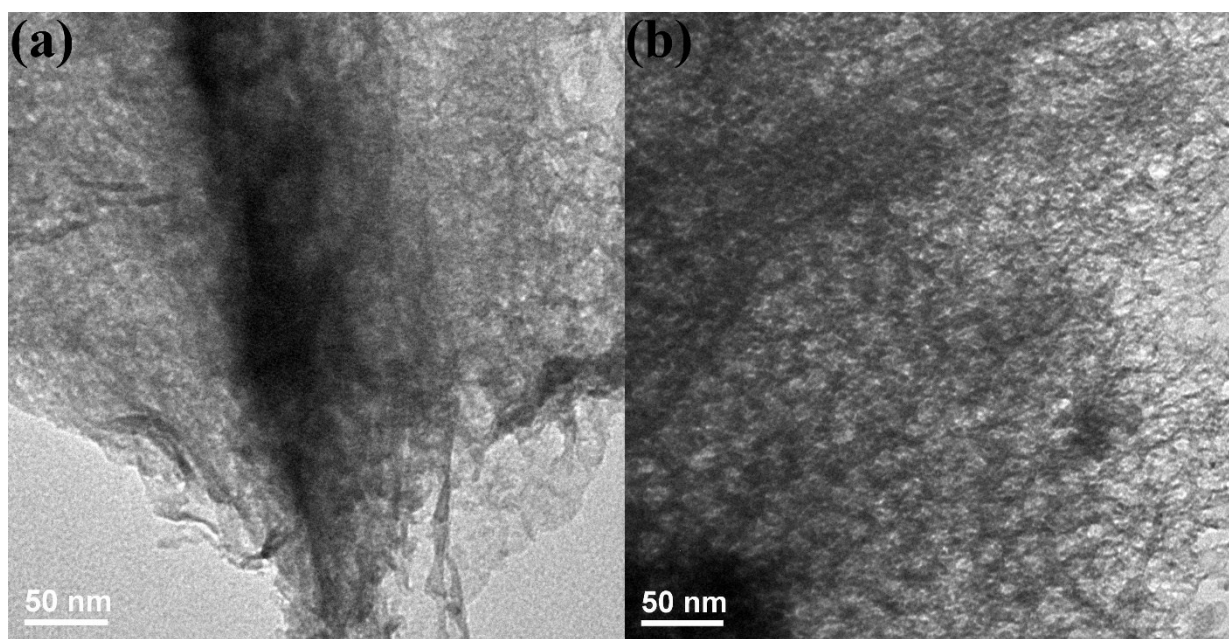

**Fig.S1** a) TEM image of mpg-C<sub>3</sub>N<sub>4</sub>-1 and b) mpg-C<sub>3</sub>N<sub>4</sub>-3

**Table S1.** XPS analysis of bulk g-C<sub>3</sub>N<sub>4</sub> and mpg-C<sub>3</sub>N<sub>4</sub>-2

| Sample                               | C%    | N%    | O%   |
|--------------------------------------|-------|-------|------|
| Bulk g-C <sub>3</sub> N <sub>4</sub> | 43.58 | 54.25 | 2.17 |
| mpg-C <sub>3</sub> N <sub>4</sub> -2 | 43.36 | 54.84 | 1.81 |
